# Supplementary material for: CD64-directed microtubule associated protein tau kills leukemic blasts ex vivo
Source: PubMed Central journal article supplement (PMC5341865; doi:10.18632/oncotarget.11568), 2016-08-24
Supplement: oncotarget-07-67166-s001.pdf [file oncotarget-07-67166-s001.pdf]

## CD64-directed microtubule associated protein tau kills leukemic blasts *ex vivo*

### SUPPLEMENTARY FIGURES LEGENDS

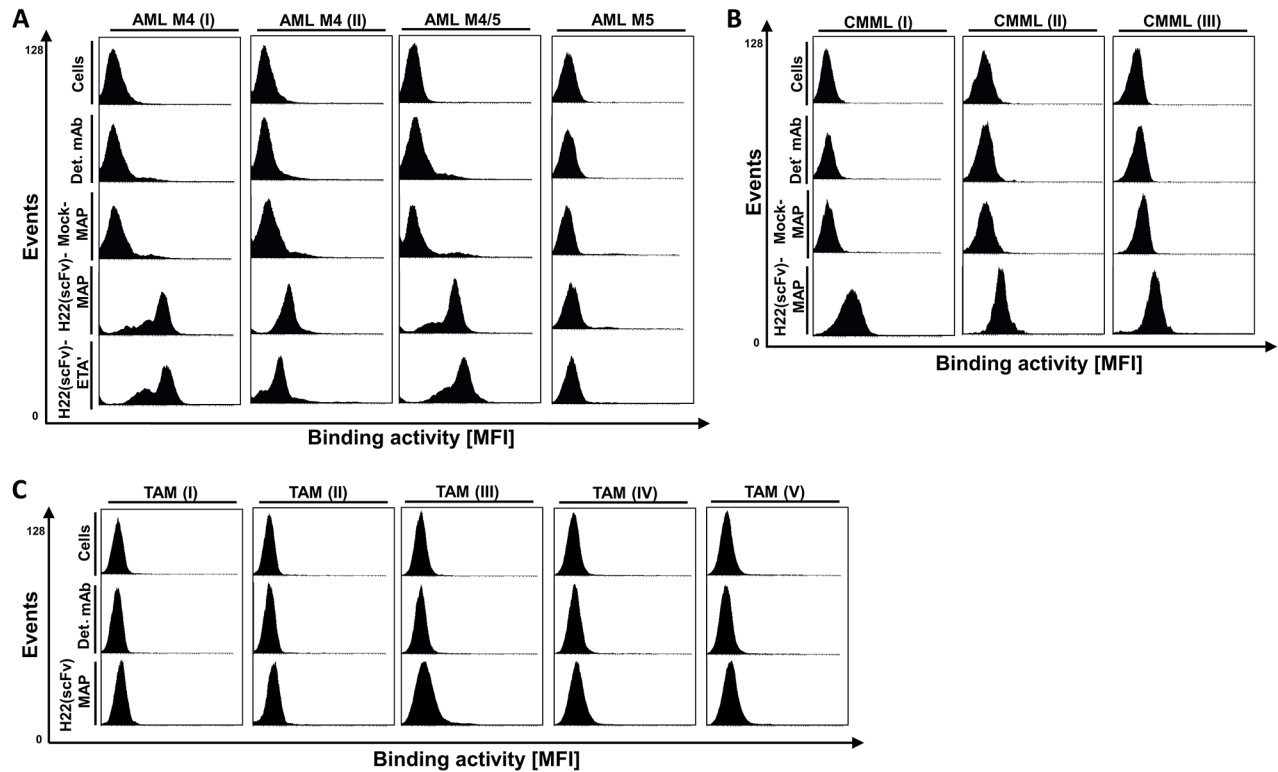

**Supplementary Figure S1: H22(scFv)-MAP binds efficiently CD64+ leukemic blasts *ex vivo*.** Binding of H22(scFv)-ETA' and H22(scFv)-MAP to primary CD64+ leukemic blasts from four AML patients **A**, three CMML patients **B**, and healthy PBMCs polarized to TAMs (n=5) **C**. Binding was detected by flow cytometry (gated on the ~90% viable population) using the non-binding construct Mock-MAP (anti-CD30) or the detection mAb alone as controls. Binding activity was detected using a monoclonal anti-His5 antibody labeled with Alexa 488. Successful binding is indicated by a population shift towards higher mean fluorescence intensity (MFI). Abbreviations: Det. mAb, detection monoclonal antibody alone.

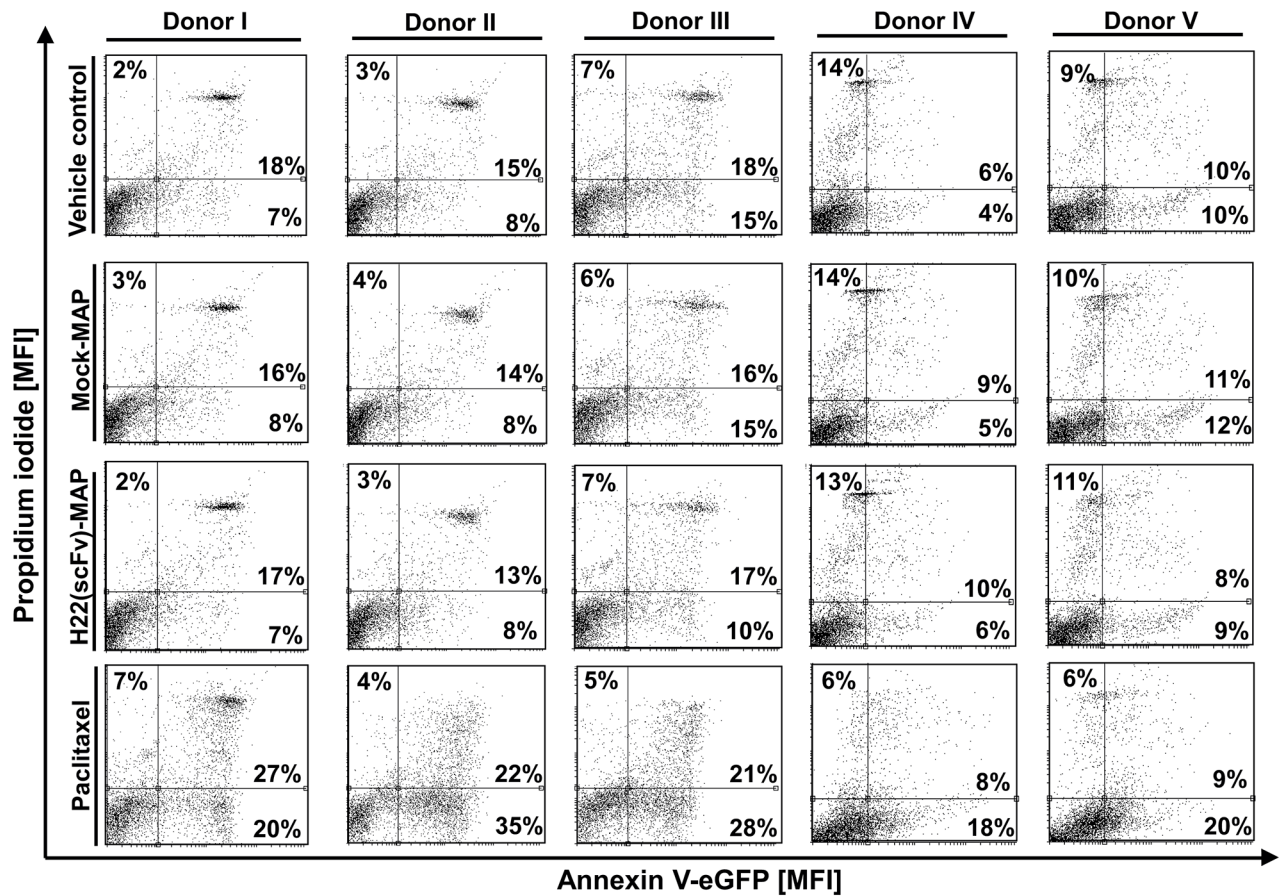

**Supplementary Figure S2: H22(scFv)-MAP spares PBMCs derived from healthy blood.** PBMCs derived from healthy blood donors were treated ex vivo with 200 nM H22(scFv)-MAP, Mock-MAP or paclitaxel for 12 h. Thereafter, the cells were stained with Annexin V-eGFP and PI. Dot blots (ungated) show the specific pro-apoptotic effect of paclitaxel compared to Mock-MAP and H22(scFv)-MAP (both lacking any cytotoxicity). The experiment was carried out in duplicate.

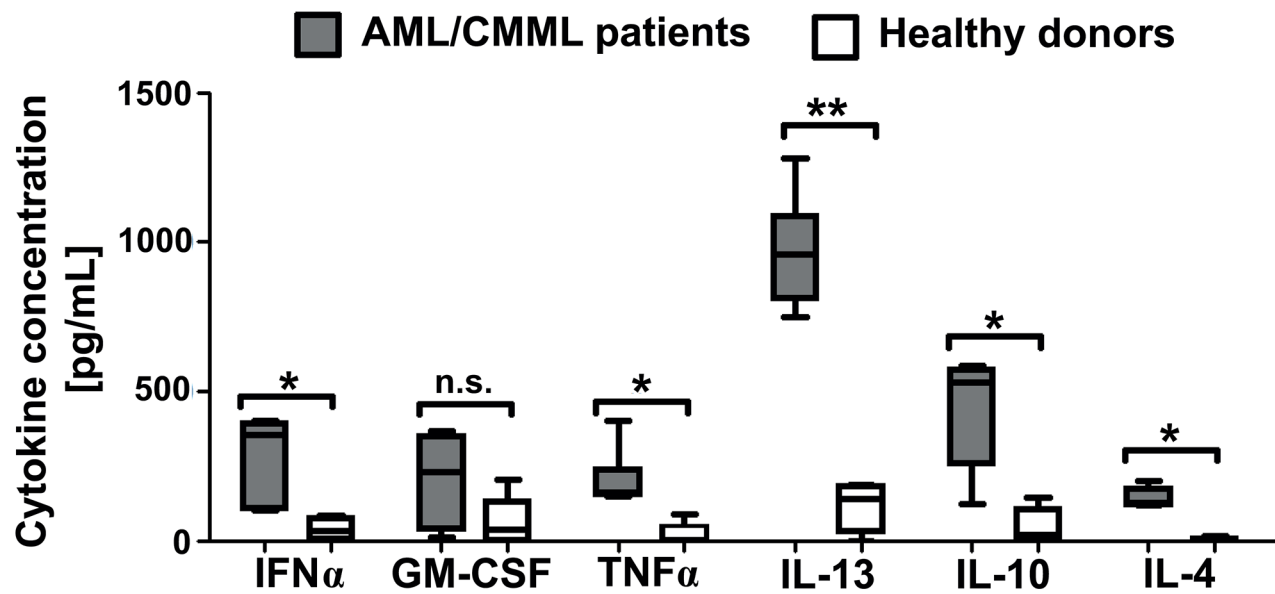

**Supplementary Figure S3: Predominance of anti-inflammatory cytokines in serum from leukemia patients compared to healthy blood donors.** The levels of pro-inflammatory cytokines (IFN $\alpha$ , GM-CSF and TNF $\alpha$ ) and anti-inflammatory cytokines (IL-13, IL10 and IL-4) were measured in serum from six of the seven leukemia patients (2x AML M4, 1x AML M4/M5 and 3x CMML) and five healthy individuals using the FlowCytomix™ Multiple Analyte Detection System (eBioscience, Frankfurt) according to the manufacturer's instructions. Data are presented as box and whiskers plots with the interquartile range and minimum/maximum values indicated by the error bars. Statistical analysis was carried out using the non-parametric one-way ANOVA test (Kruskal-Wallis test by ranks): \* $p \leq 0.05$ , \*\*  $p \leq 0.01$ .

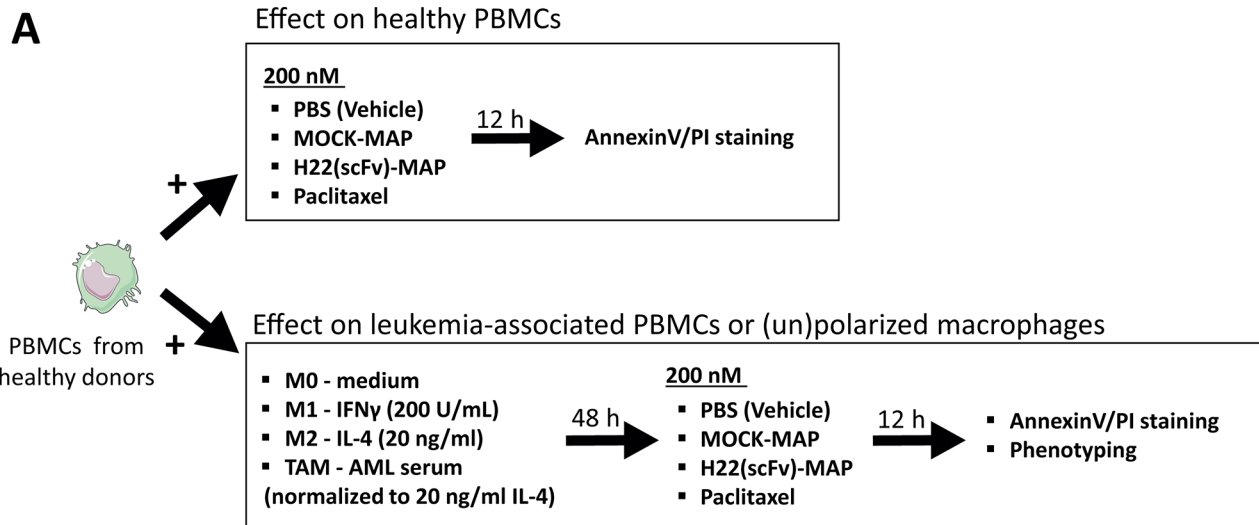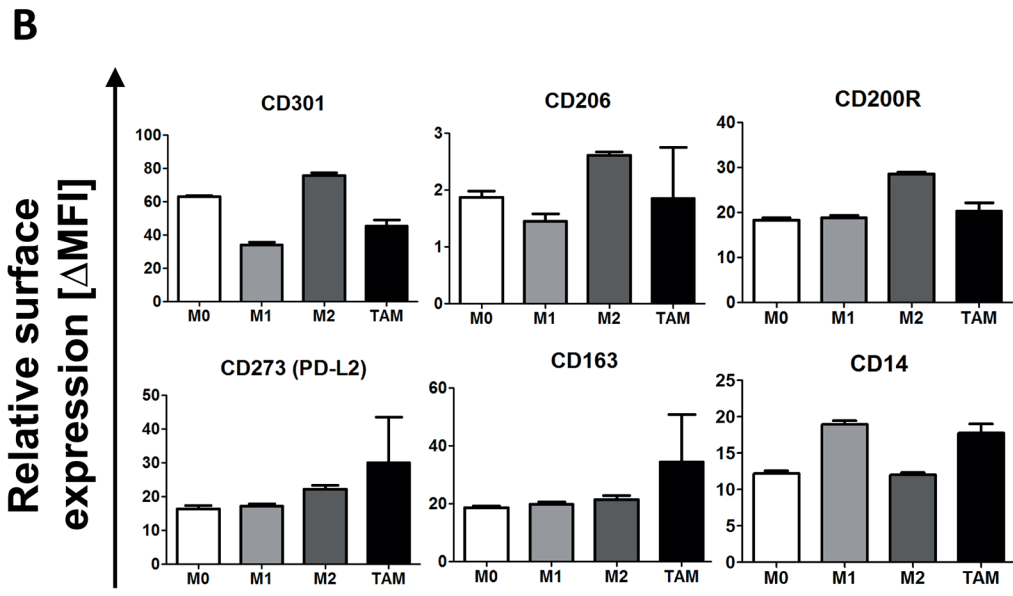

**Supplementary Figure S4: Experimental setup using PBMC-derived macrophages from healthy donors.** PBMCs were isolated from healthy blood donors and either directly used for targeting experiments or polarized to M1, M2 or TAM before targeting **A**. The M0 cells were medium conditioned macrophages, the M1 cells were induced using 100 U/ml human IFN $\gamma$ , and the M2 cells were induced using 20 ng/ml IL-4. Sterile serum from patient AML M4 (I) was used to induce the TAM phenotype. The added serum was adjusted to a final concentration of 20 ng/ml IL-4. **B**. The expression of cell-surface receptors on macrophages was analyzed by flow cytometry. The results are normalized to the isotype control and are presented as a relative surface expression level.
